# Supplementary material for: Effects of 21st‐century climate, land use, and disturbances on ecosystem carbon balance in California
Source: PubMed Central journal article supplement (PMC6851753; doi:10.1111/gcb.14677), 2019-06-24
Supplement: GCB-25-3334-s001.pdf [file GCB-25-3334-s001.pdf]

1 Effects of 21st century climate, land use, and  
2 disturbances on ecosystem carbon balance in  
3 California

4 **Supplemental Material**

5 Running Title: Ecosystem carbon balance in California

6 Benjamin M. Sleeter<sup>1\*</sup>, David C. Marvin<sup>2</sup>, D. Richard Cameron<sup>2</sup>, Paul C. Selmanns<sup>3</sup>, LeRoy  
7 Westerling<sup>4</sup>, Jason Kreidler<sup>5</sup>, Colin J. Daniel<sup>6</sup>, Jinxun Liu<sup>3</sup>, Tamara S. Wilson<sup>3</sup>

8 **Affiliations**

9 <sup>1</sup>U.S. Geological Survey, Seattle, WA, USA; bsleeter@usgs.gov; (253) 343-3363

10 <sup>2</sup>The Nature Conservancy, San Francisco, CA, USA

11 <sup>3</sup>U.S. Geological Survey, Menlo Park, CA, USA

12 <sup>4</sup>University of California Merced, California, USA

13 <sup>5</sup>U.S. Geological Survey, Boise, ID, USA

14 <sup>6</sup>Apex Resource Management Solutions Ltd., Ottawa, Alberta, CAN

15 **Keywords:** land use, climate change, carbon balance, California, scenarios, disturbance

16 **Date:** March 13, 2019

## 17 Supplemental Methods

### 18 Wildfire submodel

19 For each timestep between 2001 and 2016, wildfire was estimated deterministically using  
20 annual burn perimeters from a state fire database (FRAP) (CalFIRE, 2016). Over the  
21 historical period, fire severity was modeled based on the relative proportion of each severity  
22 class (low, medium, and high) calculated from an analysis of annual burn severity maps  
23 (1985-2014) from the Monitoring Trends in Burn Severity (MTBS) database (Eidenshink et  
24 al., 2007). Between 2017-2100, burn area was estimated for each climate model (GCM) and  
25 radiative forcing scenario (RCP) based on a statistical model of wildfire which considered the  
26 effects of climate, vegetation, population density, and fire history (Westerling, 2018). The  
27 exogenous statistical fire model was used to derive burn area projections for each climate  
28 model, radiative forcing scenario, and land-use scenario (Sleeter, Wilson, Sharygin, & Sherba,  
29 2017). For each scenario, 100 stochastic simulations were run and summarized to produce  
30 a time series of maps where each 1/16 degree cell had a projected mean burned area. The  
31 spatial maps were then summarized to provide a mean and standard deviation of total burn  
32 area for each ecoregion considered in this study.

33 The LUCAS model simulated individual fire events which spread across the landscape within  
34 a timestep. Fire events are projected based on 1) the expected annual burn area within  
35 an ecoregion, 2) the relative probability of an individual cell experiencing a fire, 3) the  
36 distribution of fire size, and 4) the distribution of fire severity classes. Within each ecoregion,  
37 the annual burn area was sampled, with replacement, from the distribution of burn area based  
38 on the statistical fire model. To preserve the spatial pattern of fire projected by the statistical  
39 model, we calculated the relative probability of fire for each 1/16 degree cell based on the  
40 mean estimated burn area in each timestep. Both fire size and severity were assumed to be  
41 stationary and were sampled based on historical data from FRAP and MTBS, respectively.  
42 Carbon fluxes associated with fire were based on Sleeter et al. (2018).

### 43 **Drought-induced tree mortality submodel**

44 To estimate the effects of climate on forest carbon we developed a model of drought-induced  
45 tree mortality. We used annual forest mortality data coinciding with two multi-year extreme  
46 drought periods that peaked in 2004 and 2016 and resulted in widespread tree mortality,  
47 especially for the latter drought period (Stephens et al., 2018). We used the US Forest Service  
48 Aerial Detection Survey (Moore, McAfee, & Iaccarino, 2018) annual tree mortality data,  
49 partitioned into low, medium, and high tree mortality classes (1-10, 11-20, and >20 trees per  
50 acre, respectively). We used the 60-month Standardized Precipitation Evapotranspiration  
51 Index (SPEI) (Vicente-Serrano, Beguera, & Lopez-Moreno, 2010) to track long-term drought  
52 annually across California using PRISM (PRISM Climate Group, Oregon State University,  
53 2016) 4-km historical climate data for monthly temperature and precipitation inputs, using the  
54 Thornwaite method to calculate potential evapotranspiration. We fit a binomial GLM model  
55 for each of the three mortality classes, using SPEI as a single predictor in the model. We used  
56 these models to spatially predict future drought-induced mortality for each climate model  
57 and radiative forcing scenario on an annual timestep. We estimated the annual mortality area  
58 for each ecoregion from the model outputs and sampled, with replacement, from a Gaussian  
59 distribution created from these annual ecoregional means and an assumed 50% standard  
60 deviation. We constructed annual relative probability maps from the spatial predictions and  
61 used this to constrain the pattern of disturbance. See SI Methods for more detail. We sampled  
62 from a uniform distribution using proportional carbon flux ranges of 0.01-0.10, 0.10-0.5, and  
63 0.5-1.0 for the low, medium, and high tree mortality classes, respectively.

### 64 **Soil Carbon**

65 We calculated soil carbon stock at standard intervals using soil organic carbon and bulk  
66 density produced for the contiguous U.S. at 100 m spatial resolution (Hengl et al., 2017,  
67 2014; Ramcharan et al., 2018), and coarse fragments (>2mm) produced globally at 250 m  
68 spatial resolution (Hengl et al., 2017). We summed the carbon stocks over the depth intervals

69 from 0-100 cm, and re-sampled to 1-km using mean re-sampling. SOC estimates from the  
70 SoilGrids 250-m global product explained 69% of the variation in observed data based on  
71 10-fold repeated cross-validation (Hengl et al., 2017). A separate comparison of multiple  
72 SOC estimates from global databases suggested the SoilGrids data product yielded the most  
73 accurate results at both global and regional scales (Tifafi, Guenet, & Hatté, 2018).

#### 74 **Effects of climate variability and change on net primary production (NPP)**

75 Annual variation in growth was estimated based on an empirical model of NPP (Del Grosso  
76 et al., 2008) and annual climate model projections of mean annual temperature and total  
77 precipitation (Pierce, Cayan, & Thrasher, 2014) and is described in detail in Sleeter et  
78 al. (2018). The NPP model is based on an empirical relationship between total (above-  
79 and below-ground) NPP and mean annual precipitation (MAP) for non-tree dominated  
80 ecosystems (shrublands and grasslands); for forest ecosystems the equation includes both  
81 MAP and mean annual temperature (MAT) as predictor variables. Parameters in these  
82 equations were optimized by minimizing root mean square error (RMSE) for modeled and  
83 observed TNPP, which ensures that the mean predicted TNPP value will be nearly identical  
84 to the mean observed value. Regional model estimates of forest TNPP compare well with  
85 those derived from satellite data (1% difference) and biogeochemical process models (12%  
86 difference) (Cleveland et al., 2015). A spatially explicit stationary growth multiplier was  
87 used to scale the growth on individual cells to reflect variations in productivity due to local  
88 environmental site conditions. The spatial growth multiplier was estimated by calculating  
89 the NPP anomaly for each simulation cell relative to its ecoregional mean based on 30-year  
90 climate normals (PRISM Climate Group, Oregon State University, 2016).

91 We chose not to incorporate a CO<sub>2</sub> fertilization effect (CFE) on NPP into our scenarios.  
92 Although many biochemical reaction rates increase in response to increased substrate concen-  
93 tration, there is growing evidence that other factors may limit the effect of rising atmospheric  
94 CO<sub>2</sub> on net carbon assimilation by plants. Satellite-derived estimates of NPP suggest that

95 Earth system models overestimated the CFE by 50% over a 30-year period (Smith et al.,  
96 2016), and data from free air carbon dioxide enrichment (FACE) studies indicate the CFE  
97 was reduced or disappeared entirely under limitation by water and nutrients (Reich, Hobbie,  
98 & Lee, 2014) or extreme weather conditions (hotter, drier, or wetter) (Obermeier et al., 2017).  
99 The magnitude and persistence of a CFE on NPP under future climates is unresolved, so we  
100 were unable to parameterize a CFE effect based on available data.

### 101 **Effects of climate warming on heterotrophic respiration (Rh)**

102 Future warming, and its effect on DOM turnover rates, was represented using climate model  
103 temperature projections and a Q10 function. We assumed a Q10 of 2.0 for the decay of  
104 down deadwood, decomposition of litter to the soil pool, and gaseous emissions from the  
105 soil pool, and a Q10 of 2.65 was assumed for gaseous emissions from the litter pool. These  
106 rates are generally consistent with those used in the Carbon Budget Model of the Canadian  
107 Forest Sector (CBM-CFS3) (Kurz et al., 2009). The CBM-CFS3 model does not include  
108 a Q10 for the decomposition of the slow recalcitrant pool, which might indicate our model  
109 overestimates the temperature sensitivity of SOC decay rates. However, a recent whole-profile  
110 warming experiment in California determined an effective Q10 for soil CO<sub>2</sub> efflux to be  
111 2.4 (Pries, Castanha, Porras, & Torn, 2017), suggesting our estimate of SOC temperature  
112 sensitivity may be conservative. Similar to the approach used to estimate temporal and  
113 spatial variability in NPP, a stationary spatial multiplier was used to reflect within ecoregion  
114 variability in DOM/SOC turnover based on 30-year climate normals. Next, for each GCM  
115 and RCP, ecoregion scale non-stationary temporal multipliers were used to reflect changes  
116 based on projected temperature.

### 117 **Perennial croplands and age**

118 We created a custom classification of the location and age of orchard croplands across  
119 California using a machine learning algorithm and a stack of satellite images and derivative

120 products. Our training/testing data-set consisted of field-level vector data of crop types  
121 obtained from agricultural commissioners from seven broadly representative agricultural  
122 counties. To assess orchard age, we used spectral unmixing to create an annual time series of  
123 bare ground fractional cover and created a metric to identify the occurrence of new orchard  
124 establishment that accounts for background variability in bare ground exposure of agricultural  
125 fields.

126 We created a custom classification of the location and age of perennial croplands across  
127 California because of a lack of perennial crop separation from other agricultural types  
128 (i.e. NLCD) (Homer et al., 2015) or the low local accuracy from data-sets like the US  
129 Cropland Data Layer (CDL) (Boryan, Yang, Mueller, & Craig, 2011). Our evaluation of CDL  
130 orchards against a field-level California-specific data layer commissioned by the Department  
131 of Water Resources (DWR) (California Department of Water Resources, 2017) with 97.4%  
132 orchard accuracy, found a statewide accuracy of only 64% for CDL for 2014. We excluded  
133 vineyards because of their low above-ground biomass relative to orchards. Our training  
134 and testing data-set consisted of county agricultural data from seven broadly representative  
135 counties (Butte, Colusa, Fresno, Merced, Monterey, Sonoma, Yolo) using field-level geospatial  
136 data from 2010-2011. The final data-set consisted of 10,000 randomly sampled points for  
137 orchards and 90,000 randomly sampled points for non-orchards (evenly split among other  
138 agriculture classes and natural vegetation). We used predictors composed of Landsat 5 surface  
139 reflectance bands for three different seasons in California (December-March, April-August,  
140 September-November) broadly corresponding to vegetation responses to precipitation. In  
141 addition, we included the NIRv vegetation index (Badgley, Field, & Berry, 2017) for each  
142 season, fractional land cover using spectral unmixing (shade, bare ground, vegetation, and  
143 urban) derived from the Landsat Greenest Pixel data product (Chander, Markham, & Helder,  
144 2009), elevation (Gesch et al., 2002), and slope as predictors. All data were obtained and  
145 pre-processed using Google Earth Engine, and re-sampled to 100 meter resolution. We trained  
146 a model for 2010 using a gradient boosting machine (GBM) algorithm (Candel, Parmar,

147 LeDell, & Arora, 2016) with 10-fold cross validation and an exhaustive hyperparameter search.  
148 The 2010 model had a final validation (using a 10% holdout from the training data) accuracy  
149 of 86.8% and reliability of 91.9%. We then applied this model to prediction data from 2001  
150 in order to generate a map of predicted orchards in California for that year. We assume this  
151 model is generalizable to previous years as all predictors are derived from the same satellite  
152 sensor (Landsat 5), with the exception of the elevation and slope, which are not expected  
153 to have changed. There is no available validation data from 2001 to create a statewide  
154 assessment for this layer. The map was re-sampled to 1-km using mode re-sampling.

155 Existing data layers also lacked orchard age, which is needed to produce refined estimates of  
156 orchard carbon stocks. To assess orchard age, we created an annual (1985-2001) fractional  
157 land cover using spectral unmixing (shade, bare ground, vegetation, and urban) derived from  
158 the Landsat Greenest Pixel data product (Chander et al., 2009). For every pixel identified as  
159 orchard, we used the bare ground fractional cover layer to find the year where the coefficient  
160 of variation across the entire time period crossed below a threshold of 1. We found this  
161 metric indicative of one or two years post-orchard removal after extensive manual testing  
162 using NAIP imagery as the ground truth. This 30 meter resolution pixel-level age map was  
163 passed through a majority filter with a kernel size of 150 meters (close to the minimum field  
164 size of 2.25 ha). This smoothed age map was re-sampled to 1-km using mode re-sampling.

## 165 **Forest Age**

166 We created a forest age map for the year 2001 using a combination of the Gradient Nearest  
167 Neighbor Forest Structure Stand Age (GNN Age) (Landscape Ecology, Modeling, Mapping,  
168 and Analysis (LEMMA), 2018; Ohmann, Gregory, Henderson, & Roberts, 2011), Monitoring  
169 Trends in Burn Severity (MTBS) (Eidenshink et al., 2007), and North American Forest  
170 Dynamics (NAFD) (Goward et al., 2012). We clipped all layers to California and re-projected  
171 them to the same extent and pixel dimensions. We extracted the high burn severity class from  
172 the 1984-2001 MTBS layers, assuming this to be a stand-age resetting event. We converted

173 all the high burn pixels to age since fire using 2001 as the anchor point, and combined  
174 them into a single layer by taking the minimum value across all layers. We used the ‘last  
175 disturbance year’ NAFD data layer and the GNN stand age layer and converted both to year  
176 since disturbance using 2001 as the anchor point. We combined all three of these into a single  
177 stand age at 2001 layer taking the minimum value.



178 Supplemental Figures

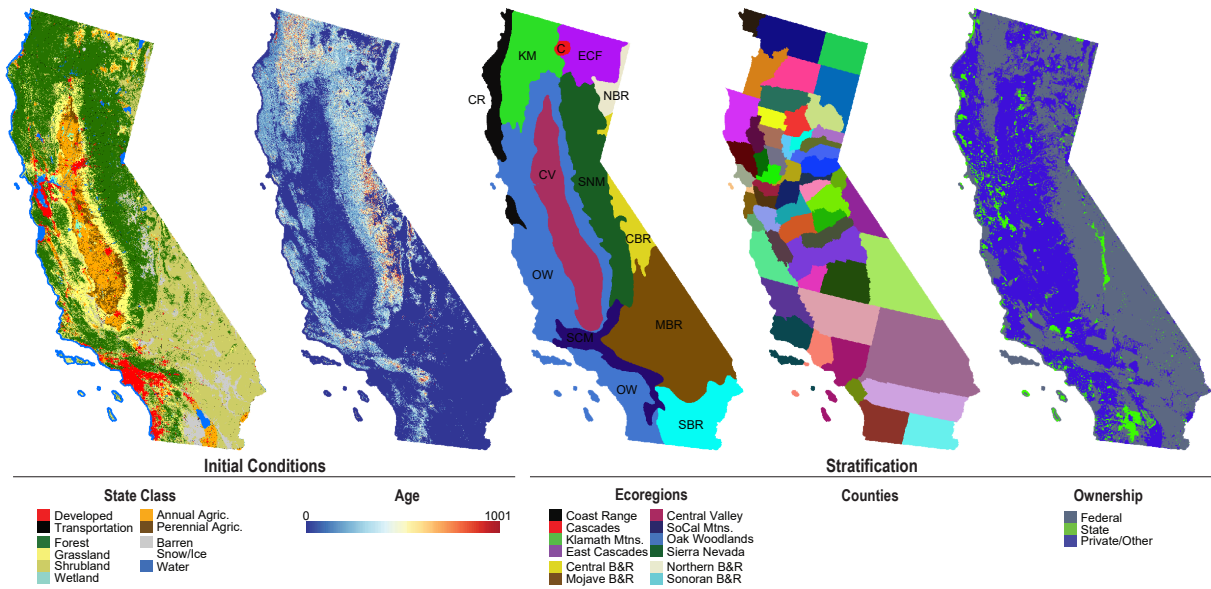

Figure 1: Maps of initial conditions and strata used in the LUCAS model. State class type was estimated based methods described in Sleeter et al., 2017. Forest age was estimated based on a gradient nearest neighbor approach and described in the methods. Ecoregions were based on the U.S. EPA’s Level III classification. County boundaries were derived from the U.S. Census Bureau’s TIGER boundary files. Ownership was derived from the U.S. Geological Survey’s Protected Areas Database

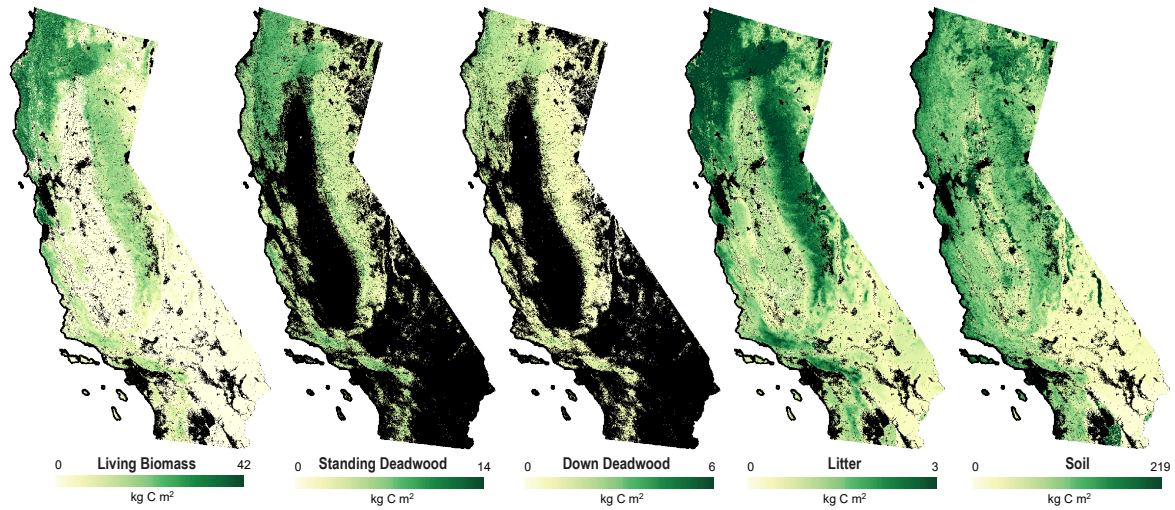

Figure 2: Maps of model initial carbon stocks. Initial stocks were estimated based on the ecoregion, state class type, and age of each simulation cell using a look-up table derived from a dynamic global vegetation model (DGVM). Values were further scaled based on a spatially explicit growth multiplier calculated using 30-year climate normals and an empirical model of NPP. See the materials and methods section for additional details, as well as Daniel et al., 2018.

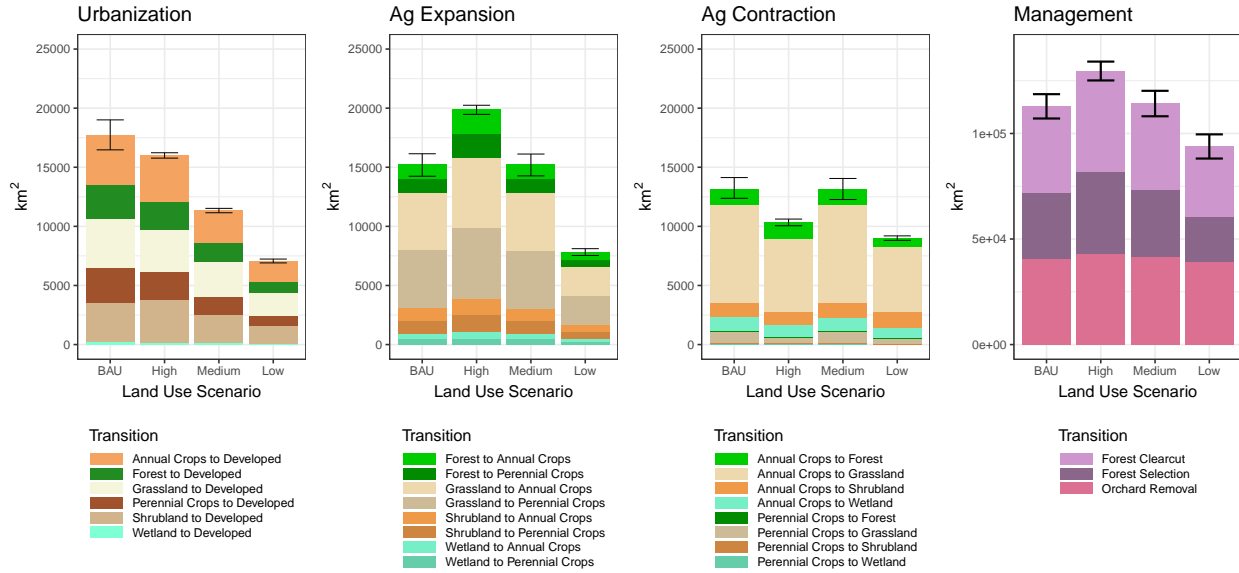

Figure 3: Mean cumulative (2001-2100) transition area for urbanization, agricultural expansion, agricultural contraction, and management transitions considered in this study. Bars show the mean estimated area for each land-use scenario averaged over all model simulations. Colored bar components show the specific from-to transition associated with each conversion type. Error bars show the Monte Carlo confidence intervals for the total cumulative conversion area.

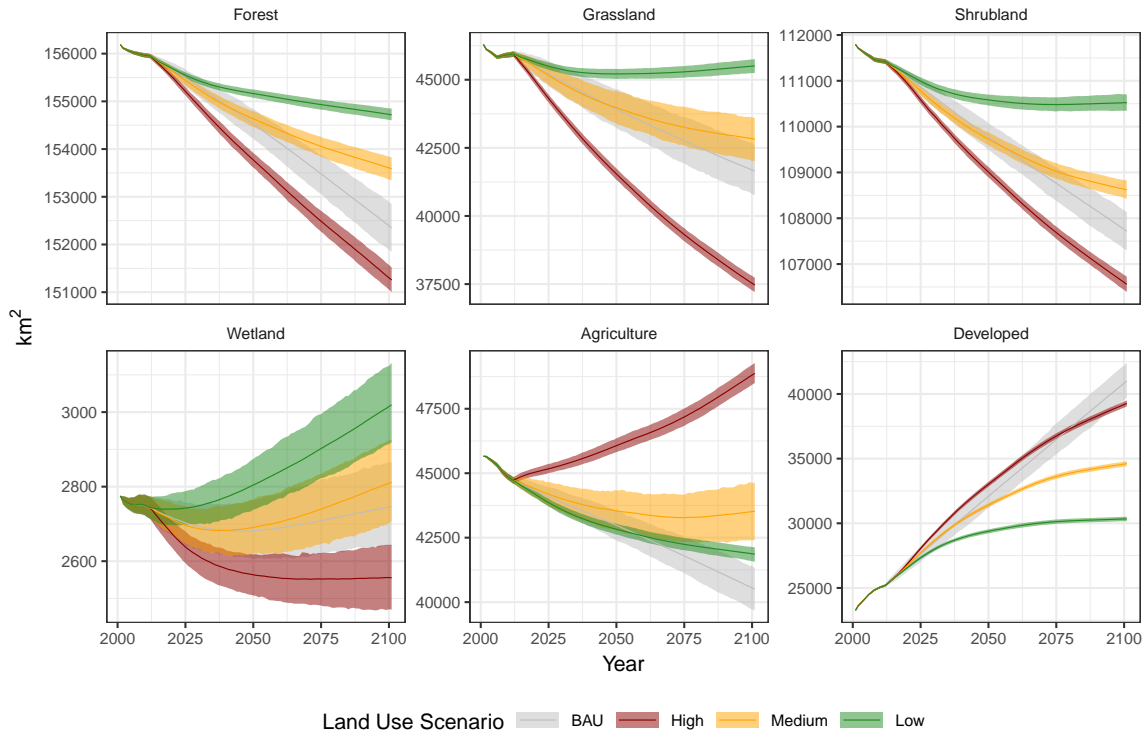

Figure 4: Estimated state class area for each land-use scenario. Lines show the mean estimate and ribbons show the Monte Carlo confidence intervals calculated over all scenario simulations.

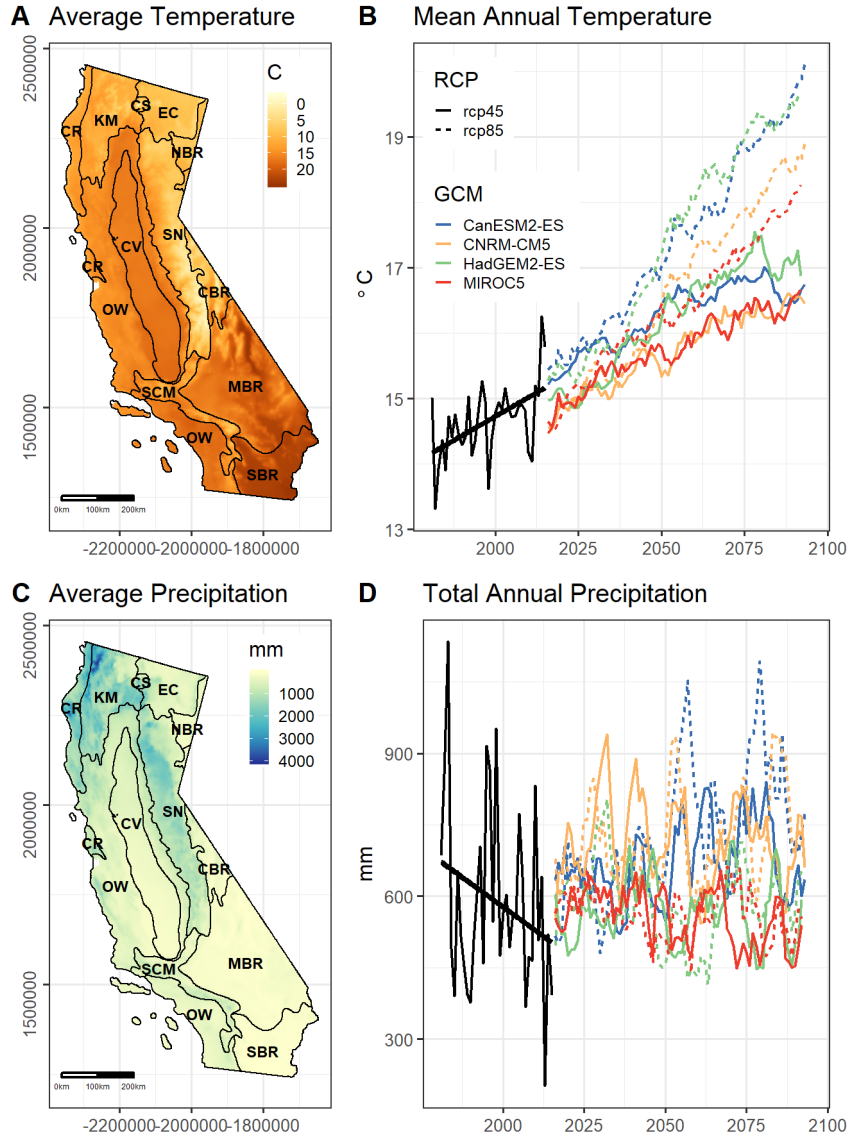

Figure 5: Maps show a) historical average annual temperature and c) precipitation based on 30-year climate normals. Plots show projected b) mean annual temperature and d) precipitation for California based on four climate models and two RCP scenarios from the LOCA down-scaled projections. Black lines show historical data based on PRISM. Projected data show the rolling 5-year average for temperature and the rolling 10-year average for precipitation.

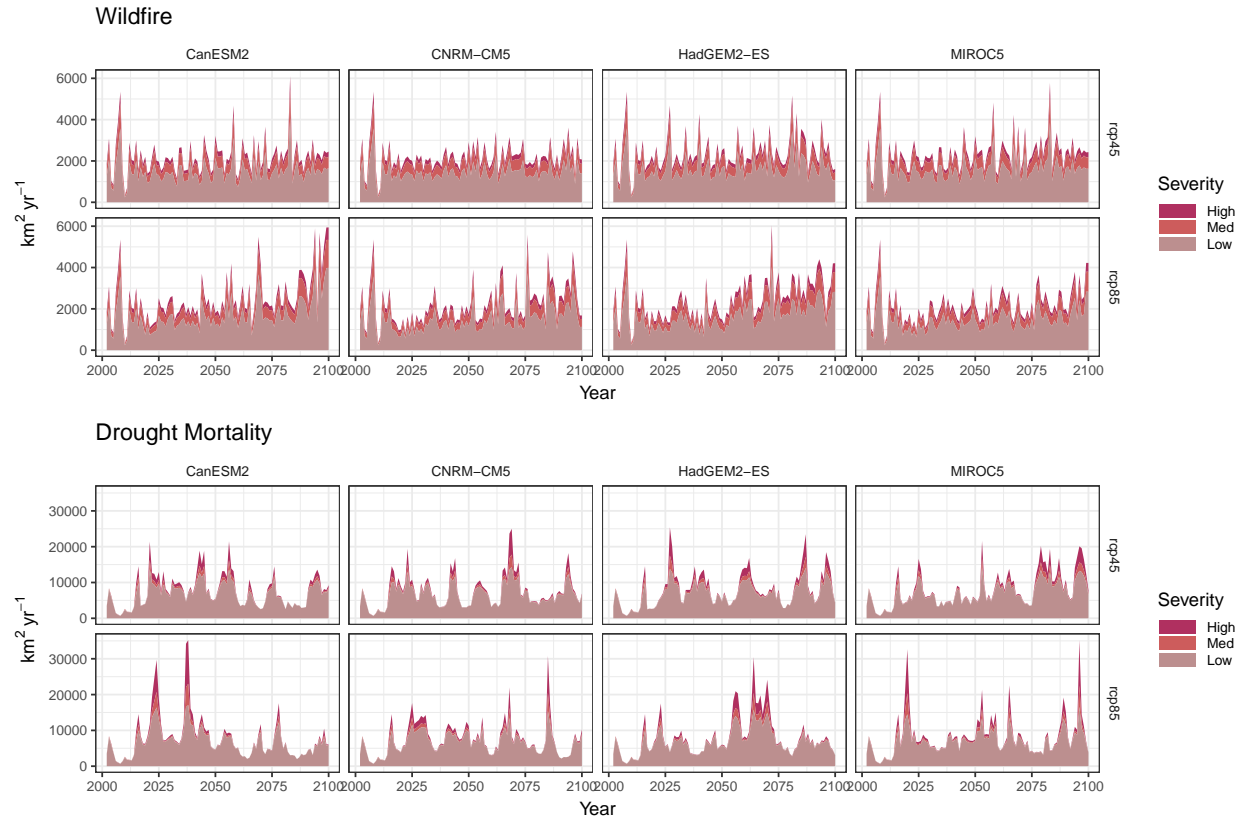

Figure 6: Mean annual estimated transition area for wildfire (top) and drought-induced tree mortality (bottom). Estimates are shown for each climate model (GCM; columns) and radiative forcing scenario (RCP; rows).

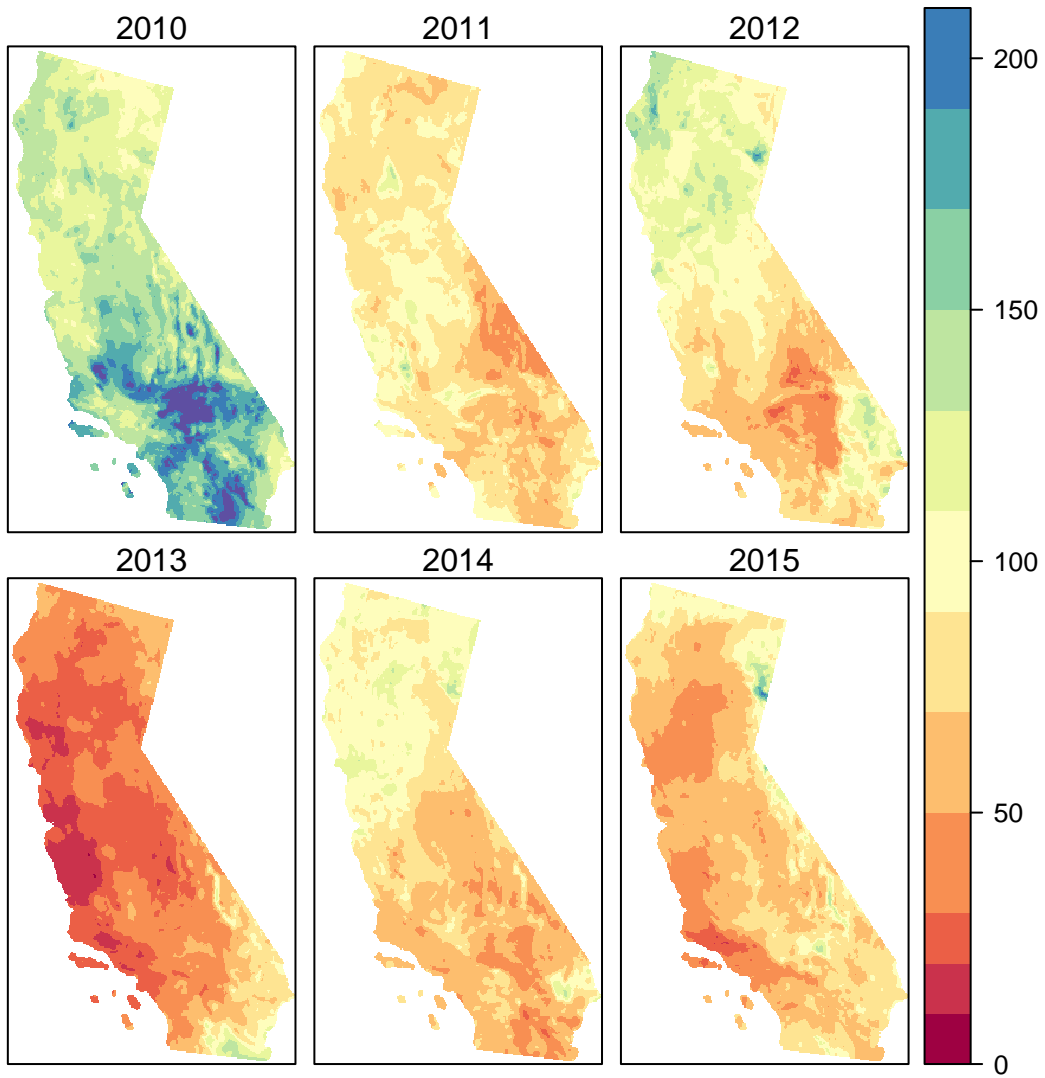

Figure 7: Annual precipitation anomaly for 2010-2015. Base period is from 1981-2010. Data are from the PRISM Climate Group.

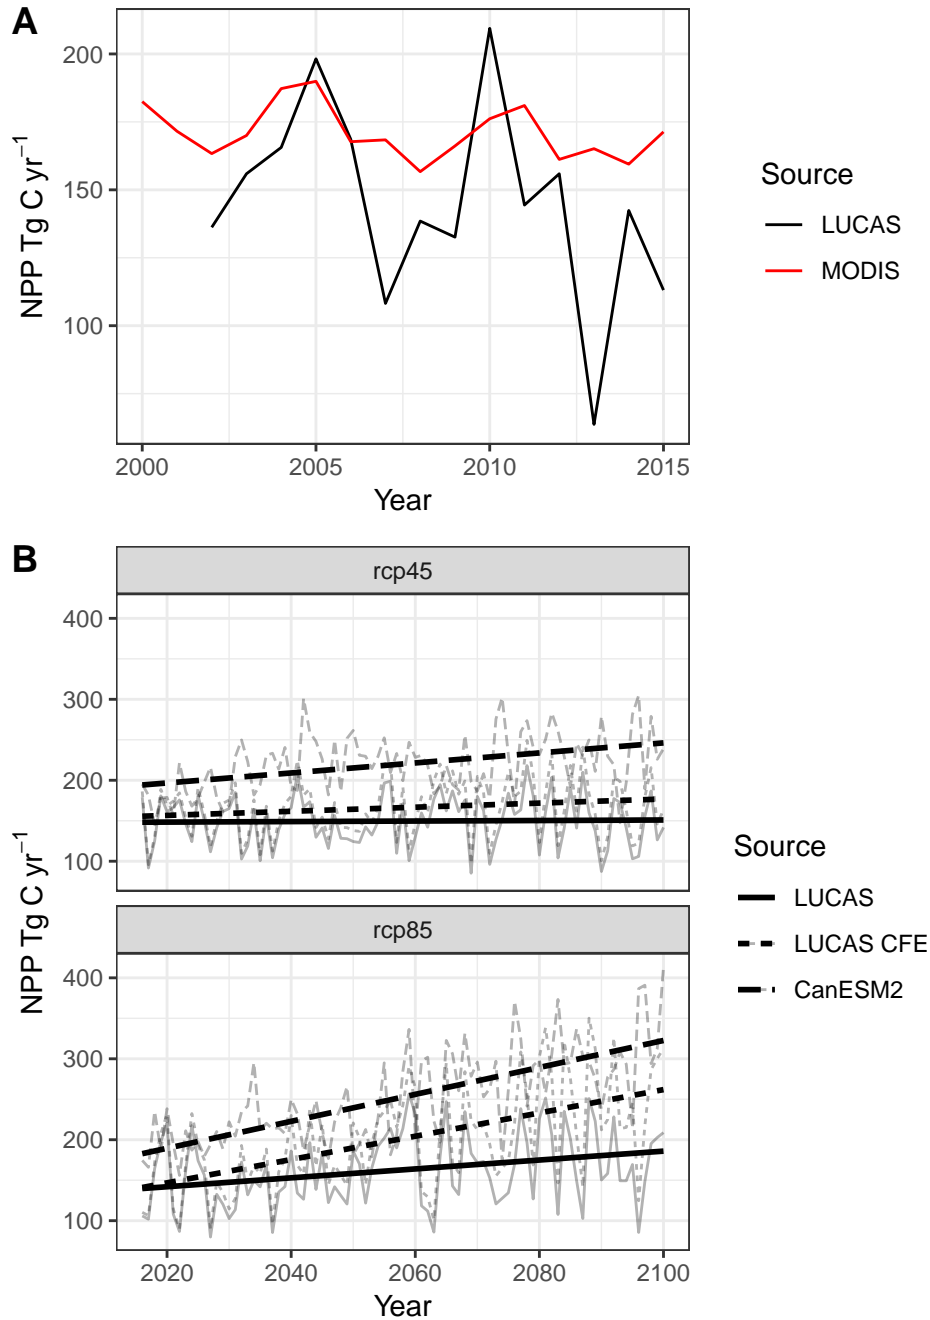

Figure 8: Comparison of net primary productivity over the historical and future periods. Panel A shows a historical comparison (2002-2015) between this study and estimates from MODIS. Panel B shows a comparison over future years (2016-2100) shows estimates from this study, compared with estimates from an Earth System Model for both RCP scenarios. Also included are estimates incorporating a High CFE.



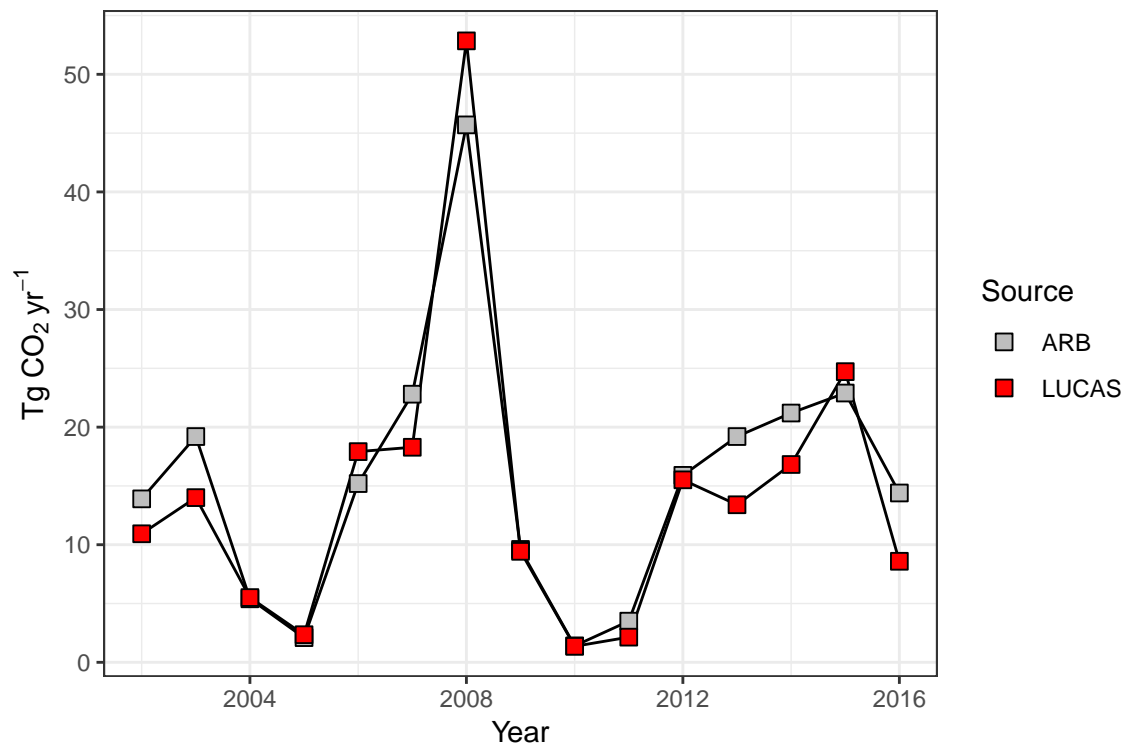

Figure 9: Comparison of modeled estimates of wildfire emissions in California from this study (LUCAS) and the California Air Resources Board (ARB).

Table 1: Comparison of carbon stocks from this study to other recent studies. Summaries of each study were based on resampling raster carbon stock maps to match the spatial extent, resolution, and projection of this study. Blackard; Estimates include above-ground live biomass carbon only. Gonzalez; Wildlands follow IPCC classification and include forestland (including shrubland and woodland), grassland, wetlands, and other land, excluding cropland and settlements. Estimates include above-ground live biomass carbon only. Kellendorfer; Estimates include above-ground live biomass carbon only. SSURGO; All valid cell values contained in the SSURGO map were included and were based on estimates to 2-meters depth. Wilson; Estimates of Live include above and below-ground live biomass carbon. DOM includes carbon stored in standing deadwood, down deadwood, and litter pools. This Study; Includes estimates for all lands classified as forest, grassland, shrubland, and agriculture (annual and perennial) but excludes wetlands and settlements. Live estimates include above and below ground carbon. SOC includes carbon stored up to 2-meters depth.

| Source          | Ecosystems     | Tg C  |        |        |
|-----------------|----------------|-------|--------|--------|
|                 |                | DOM   | Live   | SOC    |
| Blackard        | Forest         | —     | 1065.2 | —      |
| Gonzalez 2001   | Wildlands      | —     | 918.1  | —      |
| Gonzalez 2010   | Wildlands      | —     | 849.3  | —      |
| Kellendorfer    | Forest         | —     | 894.7  | —      |
| SSURGO          | Wildlands + Ag | —     | —      | 1851.5 |
| This Study 2001 | Wildlands + Ag | 375.9 | 1804.3 | 2643.0 |
| This Study 2010 | Wildlands + Ag | 389.2 | 1799.3 | 2604.4 |
| Wilson          | Forest         | 619.3 | 1113.4 | 538.2  |

## References

- Badgley, G., Field, C. B., & Berry, J. A. (2017). Canopy near-infrared reflectance and terrestrial photosynthesis. *Science Advances*, 3(3), e1602244.
- Boryan, C., Yang, Z., Mueller, R., & Craig, M. (2011). Monitoring us agriculture: The us department of agriculture, national agricultural statistics service, cropland data layer program. *Geocarto International*, 26(5), 341–358.
- CalFIRE. (2016). Fire Perimeters. Retrieved from <http://frap.cdf.ca.gov/data/frapgisdata/select.asp>
- California Department of Water Resources. (2017). Statewide crop mapping 2014. Retrieved from <https://gis.water.ca.gov/app/CADWRLandUseViewer/>

189 Candel, A., Parmar, V., LeDell, E., & Arora, A. (2016). Deep learning with h2o. *H2O. Ai*  
190 *Inc.*

191 Chander, G., Markham, B. L., & Helder, D. L. (2009). Summary of current radiometric  
192 calibration coefficients for landsat mss, tm, etm+, and eo-1 ali sensors. *Remote Sensing of*  
193 *Environment*, 113(5), 893–903.

194 Cleveland, C. C., Taylor, P., Chadwick, K. D., Dahlin, K., Doughty, C. E., Malhi, Y., ...  
195 Townsend, A. R. (2015). A comparison of plot-based satellite and earth system model  
196 estimates of tropical forest net primary production. *Global Biogeochemical Cycles*, 29(5),  
197 626–644.

198 Del Grosso, S., Parton, W., Stohlgren, T., Zheng, D., Bachelet, D., Prince, S., ... Olson, R.  
199 (2008). Global potential net primary production predicted from vegetation class, precipitation,  
200 and temperature. *Ecology*, 89(8), 2117–2126.

201 Eidenshink, J., Schwind, B., Brewer, K., Zhu, Z.-L., Quayle, B., & Howard, S. (2007). A  
202 project for monitoring trends in burn severity. *Fire Ecology*, 3(1), 3–21.

203 Gesch, D., Oimoen, M., Greenlee, S., Nelson, C., Steuck, M., & Tyler, D. (2002). The  
204 national elevation dataset. *Photogrammetric Engineering and Remote Sensing*, 68(1), 5–32.

205 Goward, S., Huang, C., Masek, J., Cohen, W., Moisen, G., & Schleeweis, K. (2012). NACP  
206 north american forest dynamics project: Forest disturbance and regrowth data. *ORNL*  
207 *DAAC*.

208 Hengl, T., Jesus, J. M. de, Heuvelink, G. B., Gonzalez, M. R., Kilibarda, M., Blagotić, A., ...  
209 others. (2017). SoilGrids250m: Global gridded soil information based on machine learning.  
210 *PLoS One*, 12(2), e0169748.

211 Hengl, T., Jesus, J. M. de, MacMillan, R. A., Batjes, N. H., Heuvelink, G. B., Ribeiro, E., ...  
212 others. (2014). SoilGrids1km—global soil information based on automated mapping. *PLoS*  
213 *One*, 9(8), e105992.

214 Homer, C., Dewitz, J., Yang, L., Jin, S., Danielson, P., Xian, G., . . . Megown, K. (2015).  
215 Completion of the 2011 national land cover database for the conterminous united states–  
216 representing a decade of land cover change information. *Photogrammetric Engineering &*  
217 *Remote Sensing*, 81(5), 345–354.

218 Kurz, W., Dymond, C., White, T., Stinson, G., Shaw, C., Rampley, G., . . . others. (2009).  
219 CBM-cfs3: A model of carbon-dynamics in forestry and land-use change implementing ipcc  
220 standards. *Ecological Modelling*, 220(4), 480–504.

221 Landscape Ecology, Modeling, Mapping, and Analysis (LEMMA). (2018). GNN Struc-  
222 ture (Species-Size) Maps. Retrieved from [https://lemma.forestry.oregonstate.edu/data/](https://lemma.forestry.oregonstate.edu/data/structure-maps)  
223 [structure-maps](https://lemma.forestry.oregonstate.edu/data/structure-maps)

224 Moore, J., McAfee, L., & Iaccarino, J. (2018). 2017 aerial survey results: California. *United*  
225 *States Department of Agriculture (USDA)*, 1–18. Retrieved from [https://www.fs.usda.gov/](https://www.fs.usda.gov/Internet/FSE_DOCUMENTS/fseprd583288.pdf)  
226 [Internet/FSE\\_DOCUMENTS/fseprd583288.pdf](https://www.fs.usda.gov/Internet/FSE_DOCUMENTS/fseprd583288.pdf)

227 Obermeier, W., Lehnert, L., Kammann, C., Müller, C., Grünhage, L., Luterbacher, J., . . .  
228 others. (2017). Reduced co2 fertilization effect in temperate c3 grasslands under more  
229 extreme weather conditions. *Nature Climate Change*, 7(2), 137.

230 Ohmann, J. L., Gregory, M. J., Henderson, E. B., & Roberts, H. M. (2011). Mapping  
231 gradients of community composition with nearest-neighbour imputation: Extending plot data  
232 for landscape analysis. *Journal of Vegetation Science*, 22(4), 660–676.

233 Pierce, D. W., Cayan, D. R., & Thrasher, B. L. (2014). Statistical downscaling using localized  
234 constructed analogs (loca). *Journal of Hydrometeorology*, 15(6), 2558–2585.

235 Pries, C. E. H., Castanha, C., Porras, R., & Torn, M. (2017). The whole-soil carbon flux in  
236 response to warming. *Science*, 355(6332), 1420–1423.

237 PRISM Climate Group, Oregon State University. (2016). PRISM climate data. Retrieved  
238 from <http://prism.oregonstate.edu>

239 Ramcharan, A., Hengl, T., Nauman, T., Brungard, C., Waltman, S., Wills, S., & Thompson,  
240 J. (2018). Soil property and class maps of the conterminous united states at 100-meter spatial  
241 resolution. *Soil Science Society of America Journal*.

242 Reich, P. B., Hobbie, S. E., & Lee, T. D. (2014). Plant growth enhancement by elevated co2  
243 eliminated by joint water and nitrogen limitation. *Nature Geoscience*, 7(12), 920.

244 Sleeter, B. M., Liu, J., Daniel, C., Rayfield, B., Sherba, J., Hawbaker, T. J., . . . Loveland, T.  
245 R. (2018). Effects of contemporary land-use and land-cover change on the carbon balance of  
246 terrestrial ecosystems in the united states. *Environmental Research Letters*, 13(4), 045006.

247 Sleeter, B. M., Wilson, T. S., Sharygin, E., & Sherba, J. T. (2017). Future scenarios of land  
248 change based on empirical data and demographic trends. *Earth's Future*, 5(11), 1068–1083.

249 Smith, W. K., Reed, S. C., Cleveland, C. C., Ballantyne, A. P., Anderegg, W. R., Wieder,  
250 W. R., . . . Running, S. W. (2016). Large divergence of satellite and earth system model  
251 estimates of global terrestrial co 2 fertilization. *Nature Climate Change*, 6(3), 306.

252 Stephens, S. L., Collins, B. M., Fettig, C. J., Finney, M. A., Hoffman, C. M., Knapp, E.  
253 E., . . . Wayman, R. B. (2018). Drought, tree mortality, and wildfire in forests adapted to  
254 frequent fire. *BioScience*, 68(2), 77–88.

255 Tifafi, M., Guenet, B., & Hatté, C. (2018). Large differences in global and regional total soil  
256 carbon stock estimates based on soilgrids, hwsd, and ncsd: Intercomparison and evaluation  
257 based on field data from usa, england, wales, and france. *Global Biogeochemical Cycles*, 32(1),  
258 42–56.

259 Vicente-Serrano, S. M., Beguera, S., & Lopez-Moreno, J. I. (2010). A multiscalar drought  
260 index sensitive to global warming: The standardized precipitation evapotranspiration index.  
261 *Journal of Climate*, 23(7), 1696–1718.

262 Westerling, A. L. (2018). Wildfire simulations for california's fourth climate change as-  
263 sessment: Projecting changes in extreme wildfire events with a warming climate. Re-

264 trieved from [http://www.climateassessment.ca.gov/techreports/docs/20180827-Projections\\_](http://www.climateassessment.ca.gov/techreports/docs/20180827-Projections_)  
265 [CCCA4-CEC-2018-014.pdf](#)
